# Summer temperature can predict the distribution of wild yeast populations.

Heather A. Robinson, Ana Pinharanda\* and Doua Bensasson

Faculty of Life Sciences, University of Manchester, Manchester, United Kingdom, M13 9PT.

23<sup>rd</sup> September, 2015

Author for correspondence:

Doua Bensasson

Faculty of Life Sciences

University of Manchester

Michael Smith Building

Oxford Road

Manchester, M13 9PT

United Kingdom

douda.bensasson@manchester.ac.uk

---

\*Present address: Department of Zoology, University of Cambridge

# Abstract

1 The wine yeast, *Saccharomyces cerevisiae*, is the best understood microbial eukaryote at  
 2 the molecular and cellular level, yet its natural geographic distribution is unknown. Here we  
 3 report the results of a field survey for *S. cerevisiae*, *S. paradoxus* and other budding yeast on  
 4 oak trees in Europe. We show that yeast species differ in their geographic distributions, and  
 5 investigated which ecological variables can predict the isolation rate of *S. paradoxus*, the  
 6 most abundant species. We find a positive association between trunk girth and *S. paradoxus*  
 7 abundance suggesting that older trees harbour more yeast. *S. paradoxus* isolation frequency  
 8 is also associated with summer temperature, showing highest isolation rates at intermediate  
 9 temperatures. Using our statistical model, we estimated a range of summer temperatures  
 10 at which we expect high *S. paradoxus* isolation rates, and show that the geographic dis-  
 11 tribution predicted by this optimum temperature range is consistent with the worldwide  
 12 distribution of sites where *S. paradoxus* has been isolated. Using laboratory estimates of  
 13 optimal growth temperatures for *S. cerevisiae* relative to *S. paradoxus*, we also estimated  
 14 an optimum range of summer temperatures for *S. cerevisiae*. The geographical distribution  
 15 of these optimum temperatures are consistent with the locations where wild *S. cerevisiae*  
 16 have been reported, and can explain why only human-associated *S. cerevisiae* strains are  
 17 isolated at northernmost latitudes. Our results provide a starting point for targeted isolation  
 18 of *S. cerevisiae* from natural habitats, which could lead to a better understanding of climate  
 19 associations and natural history in this important model microbe.

20 **Word count:** 248

21 **Keywords:** Species range, climate envelope modelling, *Lachancea thermotolerans*, *Wick-*  
 22 *erhamomyces anomalus*, *Candida albicans*, *Saccharomyces kudriavzevii*, microbial ecol-  
 23 ogy.

# 24 Introduction

25 The wine yeast, *Saccharomyces cerevisiae* is of considerable importance to humans for  
 26 agriculture, industry, and basic research, but little is known about its ecology (Goddard  
 27 and Greig, 2015; Liti, 2015). Wild populations of *S. cerevisiae* have been isolated from  
 28 oak and other tree species in North America, Europe and Asia (Sniegowski *et al.*, 2002;  
 29 Sampaio and Gonçalves, 2008; Diezmann and Dietrich, 2009; Wang *et al.*, 2012; Hyma  
 30 and Fay, 2013), and are genetically distinct from those associated with human activity  
 31 (Fay and Benavides, 2005; Cromie *et al.*, 2013; Almeida *et al.*, 2015). These woodland  
 32 habitats and the populations they contain therefore represent a good target for revealing  
 33 the ecology of *S. cerevisiae*, and the full extent of phenotypic and genetic diversity within  
 34 the species. A fundamental challenge, however, is that the natural geographic distribution  
 35 of *S. cerevisiae* is unknown. Indeed, geographic distributions are described for only few  
 36 individual, free-living microbial species (Taylor *et al.*, 2006; Green and Bohannan, 2006;  
 37 Martiny *et al.*, 2006). In Portugal and parts of the USA, *S. cerevisiae* is sympatric with *S.*  
 38 *paradoxus* (Sniegowski *et al.*, 2002; Sampaio and Gonçalves, 2008; Hyma and Fay, 2013).  
 39 In northern Europe and Canada however, intensive sampling has yielded only *S. paradoxus*  
 40 (Johnson *et al.*, 2004; Charron *et al.*, 2014; Kowallik *et al.*, 2015; Sylvester *et al.*, 2015;  
 41 Leducq *et al.*, 2015). Without knowing the expected geographic distribution of the species,  
 42 wild populations of *S. cerevisiae* remain challenging to find, hindering studies on its natural  
 43 ecology and genetic diversity.

44 Experiments in the lab show that *S. cerevisiae* has a higher optimum growth temperature  
 45 than *S. paradoxus* (Sweeney *et al.*, 2004; Salvadó *et al.*, 2011; Leducq *et al.*, 2014). Some  
 46 aspect of seasonal temperature may therefore predict the differences in the geographic  
 47 range of these species (Charron *et al.*, 2014; Leducq *et al.*, 2014). It seems unlikely that  
 48 winter temperatures would be the best predictor of the differences in geographic distribu-  
 49 tions between the two species since they grow at similar rates at low temperatures (5-23°C;

Sweeney *et al.*, 2004; Salvadó *et al.*, 2011). Furthermore, both *S. paradoxus* and *S. cerevisiae* strains isolated from North American oak trees show high tolerance to freezing and thawing (Will *et al.*, 2010). In contrast, *S. cerevisiae* strains grow much faster than *S. paradoxus* at temperatures over 30°C, and *S. cerevisiae* strains are typically able to grow at temperatures over 40°C whereas most *S. paradoxus* cannot (Liti *et al.*, 2009; Salvadó *et al.*, 2011). The optimum growth temperatures for both species (Sweeney *et al.*, 2004; Salvadó *et al.*, 2011) are also similar to maximum summer temperatures in Europe and North America (Hijmans *et al.*, 2005). Therefore, in this study we investigated summer temperature as a potential predictor of the geographic distributions of *S. cerevisiae* and *S. paradoxus*.

We surveyed for the presence of *S. cerevisiae*, *S. paradoxus*, and other budding yeast on oak trees in northern and southern Europe, where summer temperatures are especially low and high. As well as summer temperature, we considered other ecological variables that might be important in this habitat. For example, ancient oaks seem likely to harbour a much greater diversity of microbes than young trees, and thus we also collected trunk girth data as a proxy for tree age. We isolated wild *S. cerevisiae* only in southern Europe, and at a rate that was too low for a direct analysis of its distribution. Focusing instead on the distribution of its sister species, *S. paradoxus*, we detected associations between isolation rate, trunk girth and summer temperature, and used our model of these relationships to estimate the range of summer temperatures where *S. paradoxus* is predicted to be most abundant on oak trees. Using our estimated optimal temperature range for *S. paradoxus* and a laboratory estimate of the difference in temperature preference for woodland *S. cerevisiae* and *S. paradoxus* strains (Sweeney *et al.*, 2004), we predicted the worldwide geographic distributions of optimal summer temperatures for both species. In order to test our predictions, we compiled a dataset of sampling locations and genotype information that includes hundreds of *S. cerevisiae* as well as *S. paradoxus* isolates from previous studies (Liti *et al.*, 2009; Zhang *et al.*, 2010; Kuehne *et al.*, 2007; Leducq *et al.*, 2014; Naumov *et al.*, 1997;

77 Cromie *et al.*, 2013; Wang *et al.*, 2012; Almeida *et al.*, 2015, and references therein). We  
78 show that the geographic distribution of *S. paradoxus* and wild *S. cerevisiae* is consistent  
79 with the potential ranges that we predict based on their optimal temperatures. We discuss  
80 the implications of our results for future field sampling and research into the ecology and  
81 evolutionary genetics of these and other yeast species.

## 82 **Materials and Methods**

### 83 **Isolation of yeasts from fruit and oaks**

84 Between September 2006 and November 2011, we collected 812 environmental samples  
85 from oak trees (UK, France and Greece), fruiting fig trees (Portugal and Greece), vineyard  
86 grapes (UK) and garden grapes (Greece) (Table 1, Table 2, Figure 1). The substrates tested  
87 for oak were mostly bark ( $n = 618$ ), but a small number of soil samples ( $n = 15$ ) were also  
88 collected at the base of some oak trees. The substrates tested for fig and grape were mostly  
89 fruit ( $n = 84$  and  $n = 53$ , respectively), but also include fig bark ( $n = 9$ ), grape bark ( $n = 21$ )  
90 and grape must ( $n = 12$ ).

91 Host plants were photographed and longitude and latitude were recorded in WGS84 for-  
92 mat (<https://github.com/bensassonlab/yeastecology/>). Oak trees were classified as *Quercus*  
93 *robur*, *Q. petraea*, *Q. pubescens*, *Q. virgiliana*, *Q. frainetto* and *Q. ilex* using field guides  
94 (Sutton, 1990; Fitter and More, 2002). As an indicator of oak tree age, we measured trunk  
95 girth approximately 1m above the base of the tree. A number of the oak trees sampled were  
96 coppiced, and in these cases oak girth measurements taken from a single trunk underes-  
97 timate the age of trees relative to uncoppiced trees. Using photographs of each tree, we  
98 treated trunk girth as missing data for 20 trees that were either coppiced or for which we  
99 could not determine coppicing status. No girth measurements were taken for an additional  
100 two trees sampled. In total, trunk girth data was missing for 22 trees out of 126 in our final  
101 statistical model.

102 Using sterile technique, environmental samples were collected from each host plant, stored  
103 in tubes for up to a week at room temperature, and weighed upon return to the laboratory.  
104 All samples were then incubated for at least two weeks in a liquid medium containing  
105 chloramphenicol and 7.6% ethanol that enriches for *Saccharomyces* (Sniegowski *et al.*,

2002). Most samples were incubated at 30°C, but 16 pilot samples were incubated at 10°C, and 18 at 25°C. Aliquots from 7.6% ethanol enrichment medium were streaked onto selective plates with a sole carbon source of methyl- $\alpha$ -D-glucopyranoside (Sniegowski *et al.*, 2002), and if weak yeast-like growth was seen on selective plates, then we also streaked from the 7.6% ethanol enrichment medium onto yeast extract peptone glucose (YPD) agar plates.

For each of the yeast-containing environmental samples, we picked multiple colonies from selective or YPD plates, pooled them in a single YPD liquid culture, and grew these pooled cultures to stationary phase. An aliquot of the pooled colony YPD liquid culture was preserved in 15% glycerol at -80°C, while the rest was used for DNA extraction. This pooled DNA was tested for the presence of our target species, *S. cerevisiae* and *S. paradoxus*, with species-specific PCR primers. In parallel, for every environmental sample that had yeast-like colonies on the original plates, we also picked a single colony into YPD liquid medium, preserved an aliquot of this single colony YPD culture, and identified the yeast species present. If tests on pooled DNA showed that an environmental sample contained *S. cerevisiae* or *S. paradoxus*, but the single colony culture contained a different species, then we plated the pooled culture and tested more individual colonies from this or from the original plate until we isolated *S. cerevisiae* or *S. paradoxus*. By testing both pooled samples and single colony cultures, it was possible to detect *S. cerevisiae* or *S. paradoxus* when other species were also present, as well as to detect *S. cerevisiae* and *S. paradoxus* in the same samples. As a result, we occasionally isolated *S. cerevisiae* or *S. paradoxus* with other yeast species from single environmental samples (8 out of 812 samples).

## Identification of yeast species

DNA was extracted from yeast using the Promega Wizard® Genomic DNA purification kit, according to the manufacturer's instructions for yeast, except that only 75 units of lyticase (Sigma) were typically used in an overnight incubation at 37°C. Conditions for PCR and DNA sequencing were as described in Bensasson (2011). DNA sequencing reads from PCR products were assembled using the Gap4 shotgun assembly tool of Pregap4 version 1.6-r (Bonfield *et al.*, 1995). Base accuracies were estimated by Pregap4 using its logarithmic (phred) scale. Consensus sequences were all exported from Gap4 (version 4.11.2-r.) in fasta format. Low quality consensus base calls were defined as those with a phred-scaled quality below q40, and were masked in the consensus sequence as "N". Most DNA sequences ( $n = 300$ ) had more than 200 high quality bases and fewer than 100 low quality bases and were submitted to NCBI [KT206983-KT207282]. A further 71 DNA sequences did not meet GenBank submission criteria, because they were technical replicates, were less than 200 bases long or contained more than 100 Ns, but were of sufficient quality for species identification and are available at <https://github.com/bensassonlab/yeastecology/>.

We used rapidly evolving centromeres (CEN6, CEN9 and CEN15) to identify *S. cerevisiae* and *S. paradoxus* strains (Bensasson *et al.*, 2008), and rDNA (18SrRNA-ITS1-5.8SrRNA-ITS2-25SrRNA) to identify other yeast species. All DNA samples were tested with primers specific to *Saccharomyces* CEN6, one *S. cerevisiae*-specific primer pair and one *S. paradoxus*-specific centromere primer pair (CEN6, CEN9 and CEN15; Bensasson, 2011; Supplemental file 1). In cases where PCR products were amplified using species-specific CEN primers, we sequenced at least one species-specific PCR product. All other DNA samples were tested using generic rDNA PCR primers (Supplemental File 1) and at least one rDNA sequence was generated for every isolate. We designed generic rDNA primers using primer3 (<http://primer3.sourceforge.net/>) that would anneal to all known Saccharomycetales rDNA sequences (in NCBI, June 2007), including 15 different Debaryomycetaceae



154 and Saccharomycetaceae species.

155 Each isolate was then classified on the basis of the similarity of its centromere or rDNA  
 156 to known yeast species using NCBI BLAST (<https://blast.ncbi.nlm.nih.gov/>). Every DNA  
 157 sequence was queried against the nucleotide collection (nr/nt, date: August 28th, 2015)  
 158 database restricted to the Ascomycota (taxid:4890), excluding a strain with *Lachancea*  
 159 *thermotolerans* rDNA sequence that was classified as *S. paradoxus* in GenBank (Entrez  
 160 Query “NOT LL12.027”). Searches were performed using the blastn algorithm (version  
 161 2.2.32+), with an expect threshold of 0.001, and no filtering for low complexity regions.  
 162 Blast output was parsed using a custom perl script to extract the species names for hits with  
 163 the highest blast score, and to assign species given a set of species name synonyms defined  
 164 in the NCBI taxonomy (Supplemental File 2. For most yeast isolates ( $n = 247$ ), species as-  
 165 signment was unambiguous; all hits with the highest BLAST score belong to only a single  
 166 species (sometimes with multiple synonyms), and we assumed this was the species isolated.  
 167 For a few strains ( $n = 17$ ), DNA sequence had equal BLAST scores for multiple species,  
 168 and in these cases we could only assign species to genus or higher taxonomic levels.

## 169 Statistical analysis

170 All statistical and graphical analyses were conducted in R, version 3.1.1. Maps were  
 171 drawn using the raster (version 2.3-40) and maps (version 2.3-9) packages using summer  
 172 temperature ( $T_{max}$ ) data from the WorldClim dataset version 1.4 (1950-2000, release 3,  
 173 <http://www.worldclim.org>) at 10 arc-minute (Figure 4) or 30 arc-second (approximately  
 174 1km) resolution (Figure 5, Supplemental files 1 and 4) (Hijmans *et al.*, 2005).  $T_{max}$  was  
 175 estimated using raster for every host plant from a single pixel at 30 arc-second resolution.  
 176  $T_{max}$  in the WorldClim dataset is the daily maximum temperature, averaged over the hottest  
 177 month of the year (Robert Hijmans, personal communication).

178 Using a generalised linear model (GLM) with binomial errors, we modelled *S. paradoxus*  
 179 isolation frequency by setting the proportion of bark samples with *S. paradoxus* from an oak  
 180 tree as the response variable. The initial model included four explanatory variables and all  
 181 their possible interactions: (i) trunk girth (in metres) as a continuous variable; (ii)  $T_{max}$  (in  
 182  $^{\circ}\text{C} \times 10$ ) as a continuous variable estimated from a single pixel at 30 arc-second resolution  
 183 given the longitude and latitude of each tree; (iii) a three level factor describing oak type as  
 184 robur-like (the northern *Q. robur* or *Q. petraea*), frainetto-like (the southern *Q. frainetto*,  
 185 *Q. pubescens* or the intermediate *Q. virgiliana*) or the outgroup species *Quercus ilex*; (iv)  
 186 a continuous variable describing the frequency of non-*S. paradoxus* yeast species isolation  
 187 (the number of other yeast species isolated divided by the number of samples collected for  
 188 each tree). This initial model was simplified by subtracting terms in a stepwise manner  
 189 starting from the highest order terms and testing whether each subtraction resulted in a  
 190 worse model using  $\chi^2$  tests as recommended in Crawley (2005). The three-level factor for  
 191 oak type was then further simplified to two levels and nested models were again compared  
 192 using  $\chi^2$  tests following the principles for model simplification by contrasts described in  
 193 Crawley (2005).

194 Both the initial and final models showed expected levels of deviance given the number  
 195 of degrees of freedom (final model, residual deviance=75, *d.f.* = 98). Cook's distance  
 196 analysis was also used to identify the trees with the highest influence on the parameter  
 197 estimates of the model. As a control we investigated the effects of each of these data points  
 198 on the analysis, and found the removal of single data points did not qualitatively change  
 199 the final model. To control for the possibility that a single site in southern Europe affects  
 200 our conclusions, we investigated the effects on the analysis of dropping all data for one  
 201 southern field site at a time. In all cases, we observed all the same statistically significant  
 202 effects ( $P < 0.04$ ), and visualisation of the effects showed no qualitative difference from  
 203 the results shown in Figures 2 and 3.

## Worldwide presence and absence data for *S. paradoxus* and *S. cerevisiae*

In order to test whether *S. cerevisiae* and *S. paradoxus* have been isolated from locations with summer temperatures within the optimum ranges that we predict, we needed sample location and genotype information for a large number of strains. Sampling locations have been mapped for thousands of yeast strains from many species that have been deposited in the Centraalbureau voor Schimmelcultures collection (Robert *et al.*, 2006; Kurtzman *et al.*, 2015). This resource is not available for download however, and does not provide genotype information, which we need in order to distinguish wild from human-associated *S. cerevisiae* strains. Location information has been mapped together with genotype information for *S. paradoxus* (Boynton and Greig, 2014), but not for *S. cerevisiae*.

Therefore we collated site location information together with genotype information from previous studies on *S. cerevisiae* (Zhang *et al.*, 2010; Wang *et al.*, 2012; Cromie *et al.*, 2013; Almeida *et al.*, 2015) and *S. paradoxus* (Naumov *et al.*, 1997; Kuehne *et al.*, 2007; Liti *et al.*, 2009; Zhang *et al.*, 2010; Leducq *et al.*, 2014). No data for *S. paradoxus* strains isolated in this study that were used in the construction of our statistical model were included in this validation dataset. Site location and genotype information for *S. cerevisiae* strains isolated as part of this study were included, because no information for these strains was used to generate the model. The criteria for including data from a study were that it provided genotype information for many strains (that are not already included in a larger study) and it included strains isolated from substrates that are not wine or vineyard grapes. In most previous studies, latitude and longitude information was not included in site descriptions. We therefore used site descriptions as search terms in Google Maps. Where site descriptions map to a large region, we used latitude and longitude coordinates from the estimated centre of that region. Data for yeast strains with site descriptions that did not allow location within 100-200 km were excluded (for example, strains from unknown locations

230 or with their origin described as “Europe”). We also excluded strains isolated from wine  
 231 or vineyard grapes, because we expect that their distribution is affected by human activity  
 232 (Fay and Benavides, 2005). *S. cerevisiae* was also recorded as absent from several sites  
 233 where surveys of over 100 bark samples yielded no *S. cerevisiae*: site 1 from this study  
 234 (Table 2), Charron *et al.* (2014), Johnson *et al.* (2004) and Kowalik *et al.* (2015).

235  $T_{max}$  was estimated for every isolate using the raster package from a single pixel at 30 arc-  
 236 second resolution. For collection sites that occur at locations with summer temperatures  
 237 outside the range that we predict with our statistical model, we estimated the distance to  
 238 regions that are within the expected range. The region in which such sites occurred were  
 239 visualised using the raster and maps packages in R, and the distance (in kilometres) was  
 240 estimated using the sp package in R (version 1.1-1).

# Results

## Variation in the geographic distribution of yeast species

We conducted a field survey with the aim of isolating yeast species from the *Saccharomyces sensu stricto* genus, and isolated 264 yeast strains from 812 European oak, fig, and grape samples (Table 1, Figure 1, Supplemental File 3). These strains are from at least 26 different yeast species across the order Saccharomycetales, including 5 different yeast families: Saccharomycetaceae, Saccharomycodaceae, Debaryomycetaceae, Phaffomycetaceae, and Pichiaceae (Supplemental File 2). Although it is rarely isolated in natural environments (Tanghe *et al.*, 2005; Lachance *et al.*, 2011; Maganti *et al.*, 2011), we isolated three strains of the human commensal and pathogen, *Candida albicans* from ancient oak trees in northern Europe (site 6 in Figure 1 and Table 2, Supplemental File 1). *C. albicans* has only rarely been isolated away from mammals (Tanghe *et al.*, 2005; Lachance *et al.*, 2011; Maganti *et al.*, 2011), and the existence of wild populations of *C. albicans* on north European trees could potentially explain the hitherto puzzling maintenance of aquaporin genes that confer freeze tolerance in *C. albicans* (Tanghe *et al.*, 2005).

The most commonly isolated *Saccharomyces* species was *S. paradoxus*, which we isolated mostly from oak bark and from soil at the base of oak trees (83 out of 633 samples, Table 1). We isolated *S. cerevisiae* strains from 25 out of 179 fruit, fruit tree bark and grape must samples, but relatively few from oak-associated samples (4 out of 633, Table 1). In addition, we isolated a single strain of *S. kudriavzevii* from oak bark in Greece (site 12, Figure 1) as well as four strains of a *Saccharomyces sensu stricto* species from figs at the same site that we could not identify to the species level using our methods (Table 1). The greater prevalence of *S. cerevisiae* on fruit trees relative to oaks could however be an effect of geography and human influence, because fruit trees were only sampled in the far south

of Europe or in vineyards (Figure 1, Table 2). Indeed, when we controlled for the effects of geography by considering only sites where *S. cerevisiae* was present, we saw very similar isolation rates from fruit, fruit tree bark and oak bark (Supplemental File 1). Others have also observed similar or lower isolation rates from fruit relative to woodland substrates (Wang *et al.*, 2012), and this finding lends support to the proposal that *S. cerevisiae* is not adapted to fruit (Goddard and Greig, 2015).

In the UK, we isolated 39 *S. paradoxus* from 372 oak bark and soil samples (Table 1). This isolation rate (10%) is similar to that previously reported for *S. paradoxus* both in the UK (Johnson *et al.*, 2004) (28 isolates from 344 oak bark samples, Fisher's exact test,  $P = 0.3$ ) and Pennsylvania, USA (Sniegowski *et al.*, 2002) (8 out of 79 oak bark and soil samples, Fisher's exact test,  $P = 1$ ). In contrast, we isolated fewer *S. cerevisiae* from oak samples in the UK (1/372) than Sniegowski *et al.* (2002) did from oak trees in Pennsylvania (10/79; Fisher's exact test,  $P = 2 \times 10^{-7}$ ), even though we used the same enrichment culturing method. The fact that we were able to reproduce the *S. paradoxus* isolation rate, but not the *S. cerevisiae* isolation rate (Sniegowski *et al.*, 2002), suggests a geographic difference in the distribution of *S. cerevisiae* relative to *S. paradoxus*, with a lower abundance of *S. cerevisiae* in the UK than in Pennsylvania.

Analysis of all 264 strains isolated from all 812 European samples suggests that there are also differences in the geographic distributions of other yeast species within Europe (Table 1). In general, we were able to isolate and identify more yeast strains from southern than from northern European oak bark (104/261 compared to 84/372, Fisher's exact test,  $P = 4 \times 10^{-6}$ ). This effect is especially strong for *Lachancea thermotolerans*, a yeast common in oak bark (Sampaio and Gonçalves, 2008; Sylvester *et al.*, 2015), which is more common in southern (46 out of 261) than in northern oak bark and soil samples (16/372; Fisher's exact test,  $P = 4 \times 10^{-8}$ , Table 1). Previous studies have shown enrichment culturing at different temperatures (10°C compared to 22-30°C) results in the isolation of different yeast species

(Sampaio and Gonçalves, 2008; Sylvester *et al.*, 2015). Therefore the bias toward southern yeast distributions might simply be a consequence of the temperature we use for enrichment culturing (25-30°C). However, it is not a universal rule that all yeast species have higher isolation rates in southern versus northern locations. Notably, *Wickerhamomyces anomalus*, a food spoilage yeast that can also contribute to wine aroma (Passoth *et al.*, 2006), was common in northern oak (11 out of 372 bark and soil samples) and fruit, but was absent from southern oak bark samples (0/261; Fisher's exact test,  $P = 0.004$ ) and fruit (Table 1).

## Trunk girth and summer temperature can explain differences among oaks in *S. paradoxus* abundance

The original aim of this study was to model the ecological factors affecting the prevalence of *S. cerevisiae* in woodlands, but consistent with other studies on northern European sites (Johnson *et al.*, 2004; Kowallik *et al.*, 2015), we were unable to isolate many *S. cerevisiae* strains from European oaks. Instead, we focused our modelling efforts on its closest relative *S. paradoxus*, which was the most commonly isolated species in this study (Tables 1 and 2). For these analyses we used data for 78 strains of *S. paradoxus* isolated from 126 oak trees resulting from a total of 604 oak bark samples (Table 2). An average of 4.8 pieces of bark were collected from each tree, and in most cases (87 trees), we collected exactly 4 pieces per tree. To reduce potential variation resulting from experimental procedures, we excluded pilot data for 14 oak bark samples that were incubated at 10°C during enrichment culturing and 15 soil samples collected at the base of oak trees. Preliminary analysis showed that isolation rates are not affected by collection month and bark sample weight in this study (Supplemental File 1), and therefore these variables were not included in our final model.

315 Lab studies suggest that *S. cerevisiae* and *S. paradoxus* have different temperature prefer-  
 316 ences for their optimal growth (Sweeney *et al.*, 2004; Salvadó *et al.*, 2011) and also differ in  
 317 their tolerance of high temperatures (Liti *et al.*, 2009). Therefore, we asked whether sum-  
 318 mer temperature ( $T_{max}$ ) can predict the distribution of *S. paradoxus*, in conjunction with  
 319 other variables that could affect the prevalence of yeast on oak trees, such as host species  
 320 or tree age. Because other yeast species could potentially outcompete *S. paradoxus* in cul-  
 321 ture and affect our estimation of its isolation rate, we also consider the presence of other  
 322 yeast species isolated from each tree in our analysis. Using trunk girth as a proxy for tree  
 323 age, and binning tree species into three groups (robur-like, frainetto-like, and *Q. ilex*; see  
 324 Methods), we constructed a generalised linear model (GLM) to test whether the frequency  
 325 of *S. paradoxus* isolation from an oak tree can be predicted by four explanatory variables  
 326 (i) trunk girth, (ii) summer temperature, (iii) host tree type, and (iv) isolation frequency of  
 327 other yeast species.

328 After standard model simplification (Crawley, 2005), we found that the presence of other  
 329 yeast species does not affect the number of *S. paradoxus* isolated (GLM, -0.02% deviance,  
 330  $d.f. = 1, P = 0.9$ ). This suggests that competition among yeast during our isolation pro-  
 331 cedure does not substantially affect the rate or pattern of *S. paradoxus* isolation. However,  
 332 all three other explanatory variables are important for predicting numbers of *S. paradoxus*  
 333 isolated from oak trees. We also found that a simpler final model where oaks are classed  
 334 as northern or southern is not worse than the model describing three host types (GLM, -2%  
 335 deviance,  $d.f. = 3, P = 0.4$ ). This suggests that more general differences between northern  
 336 and southern European field sites can explain differences in *S. paradoxus* yield better than  
 337 host tree type.

338 The final GLM explains 42% of the deviance among trees in *S. paradoxus* isolation fre-  
 339 quency in terms of tree trunk girth, summer temperature, and whether a site is northern or  
 340 southern. Trunk girth is an important predictor of *S. paradoxus* isolation frequency, which



if dropped leads to a much worse model fit (GLM, -21% deviance,  $d.f. = 2$ ,  $P = 1 \times 10^{-6}$ ).  
Indeed, if we remove trunk girth data from the analysis, we find that none of the other  
significant effects in the model would have been detected, suggesting that host tree age is  
a crucial factor to consider in order to discover variables that are relevant to yeast ecology.  
As trunk girth increases, *S. paradoxus* isolation frequency increases in northern and south-  
ern Europe (Figure 2). The positive association between trunk girth and the presence of *S.*  
*paradoxus* suggests that old oak trees harbour more *S. paradoxus*.

The best predictor of the *S. paradoxus* isolation frequency for a tree was whether it was  
from northern or southern Europe. Trees from southern Europe yielded more *S. paradoxus*  
isolates, even though we sampled more trees and larger trees from northern Europe (Table  
2, Figure 3). This effect is especially clear in Figure 3 from the low isolation frequency of  
*S. paradoxus* that the model predicts in northern Europe compared to the high frequency  
expected at temperatures around 27-28°C in southern Europe. There is also a difference  
between northern and southern trees in the effect of trunk girth on *S. paradoxus* isolation  
frequency (GLM, -6% deviance  $d.f. = 1$ ,  $P = 0.004$ ). More specifically, the numbers of *S.*  
*paradoxus* isolated from southern oaks increased more steeply with increasing trunk girth  
than they did from northern oaks (Figure 2).

In southern Europe, we also observe a negative relationship between *S. paradoxus* abun-  
dance and summer temperature, whereas there is no such effect in the north (GLM, -9%  
deviance,  $d.f. = 1$ ,  $P = 0.0006$ , Figure 3). This suggests that the hottest field sites in south-  
ern Europe ( $T_{max}$ , 28-31°C) are hotter than the optimum habitat for *S. paradoxus*, which is  
consistent with laboratory observations of suboptimal growth for most strains of *S. para-*  
*doxus* at temperatures over 30°C (Sweeney *et al.*, 2004; Salvadó *et al.*, 2011; Leducq *et al.*,  
2014).

Figure 3 shows the predictions of the final model with all the variables of major effect com-  
bined. The low predicted *S. paradoxus* isolation frequency between 18 and 22°C suggests

an optimum summer temperature for *S. paradoxus* that is higher than 22°C, whereas the negative association between  $T_{max}$  and isolation rate between 28 and 31°C, suggests that the optimum is lower than 28°C. Thus, the optimum summer temperature for *S. paradoxus* appears to be between 22 and 28°C.

## Summer temperature can predict the worldwide distribution of wild *S. paradoxus* and *S. cerevisiae* populations

Our analysis of oak bark samples collected from thirteen European sites in the UK, France and Greece (Table 2, Figure 3) suggests that the optimum summer temperature ( $T_{max}$ ) for *S. paradoxus* lies between 22 and 28°C, but that this species is also found at lower abundances between 18 and 31°C (Figure 3). We tested the predictions of our model by mapping the global distribution of this thermal optimum, and comparing it to sites where *S. paradoxus* has been reported in previous studies (Naumov *et al.*, 1997; Kuehne *et al.*, 2007; Liti *et al.*, 2009; Zhang *et al.*, 2010; Leducq *et al.*, 2014). Virtually all the *S. paradoxus* strains that we mapped from other studies (244 out of 246) fall within our predicted range of optimum summer temperatures between 18 and 31°C (Figure 4A). Indeed, 75% of these *S. paradoxus* strains map to locations where  $T_{max}$  is between 22 and 28°C, and 95% occur between 20 and 30°C. We identified only two strains that could fall outside the  $T_{max}$  range of 18 to 31°C. One was from Tashkent in Uzbekistan (Naumov *et al.*, 1997), a site that we approximately mapped to the centre of Tashkent (with a  $T_{max}$  of 36°C). This approximate mapping is within 30 km of high elevation regions that have a lower summer temperature ( $T_{max}$  of 28°C), which is within our predicted optimum range. The other exception was a strain of *S. paradoxus* isolated from insect excrement (from Salem, MO, USA, 32°C  $T_{max}$ ; Leducq *et al.*, 2014), collected over 200km from locations with temperatures within the predicted range. This was one of only few animal-associated *S. paradoxus* strains (8 out of 246 strains), and the unusual location of this sample may possibly have arisen by insect

392 mediated transport from a location with expected summer temperatures.

393 Ideally, we would like to map the worldwide distribution of the model eukaryote, *S. cere-*  
 394 *visiae*. We can make progress towards this goal by combining our results from *S. paradoxus*  
 395 with the finding by Sweeney *et al.* (2004) that in the laboratory, *S. cerevisiae* from oak trees  
 396 grow optimally at roughly 7°C higher temperatures than *S. paradoxus*. We use the estimate  
 397 of the species difference in temperature preferences by Sweeney *et al.* (2004), because this  
 398 study uses a large number of *S. cerevisiae* and *S. paradoxus* strains from the same oak  
 399 habitat, with growth profiles that are typical for their species (see Supplemental File 1 for  
 400 a full discussion). In order to predict the potential geographic range of *S. cerevisiae*, we  
 401 therefore added 7°C to our climate envelope model for *S. paradoxus* to generate a global  
 402 distribution map based on predicted optimum temperatures for *S. cerevisiae* (Figure 4B).  
 403 The potential range that we predict for *S. cerevisiae* is mostly subtropical or tropical and  
 404 different from the prediction of a temperate distribution for *S. paradoxus* (Figure 4). In-  
 405 deed, the predicted worldwide range of *S. cerevisiae* is clearly more consistent with the  
 406 distribution of *S. cerevisiae* isolates than that of *S. paradoxus* (Figure 4).

407 Human culture and transport of *S. cerevisiae* across the world has affected the distribution  
 408 of this species (Fay and Benavides, 2005; Liti *et al.*, 2009; Wang *et al.*, 2012; Cromie *et al.*,  
 409 2013). Therefore, when testing the predicted distribution of optimum summer temperature  
 410 for *S. cerevisiae*, we need to distinguish strains that are associated with human activity from  
 411 wild strains. Strains associated with human activity, such as those cultured in breweries or  
 412 vineyards, can potentially escape and survive in regions with otherwise unsuitable climates  
 413 as feral strains, but these are likely to represent transient (sink) populations. The loca-  
 414 tions of sink populations do not accurately test the predictions of climate envelope models  
 415 (Araújo and Peterson, 2012). Feral *S. cerevisiae* strains are expected to have genotypes as-  
 416 sociated with human activity, such as the genotype associated with wine production, or to  
 417 be “mosaic” strains showing recent genomic admixture between natural populations (Fay

and Benavides, 2005; Liti *et al.*, 2009; Wang *et al.*, 2012; Cromie *et al.*, 2013; Almeida *et al.*, 2015).

The majority of *S. cerevisiae* isolates (222 out of 301 strains) from most of the collection sites (71 out of 92 sites) that we were able to map worldwide, mapped approximately to locations with summer temperatures within the optimum range that we predict for *S. cerevisiae* (25-38°C). Almost half the collection sites outside our predicted range occur in Europe (10 out of 21 sites) where yeast sampling intensity is relatively high (Robert *et al.*, 2006; Kurtzman *et al.*, 2015). Figure 5 shows all the *S. cerevisiae* strains ( $n = 46$ ) isolated from Europe with points coloured according to genotype. Two distinct genetic lineages of *S. cerevisiae* predominate within Europe (Cromie *et al.*, 2013; Almeida *et al.*, 2015); one is associated with humans and wine and another is associated with oak trees (Almeida *et al.*, 2015) and perhaps also olive trees (Cromie *et al.*, 2013). The vast majority of European *S. cerevisiae* with the wild genotype expected on oak trees (23 out of 26 strains) map to locations with summer temperatures within the range that we predict for *S. cerevisiae* (between 25 and 38°C, Figure 5). The three wild strains in Europe that we mapped to locations outside the predicted range of summer temperatures mapped to Mount Subasio in Italy and Jasenov polje in Montenegro (Figure 5). The locations for both of these sites were mapped approximately, and both occur in mountain regions with expected summer temperatures at lower elevation (within 3km). In contrast, several European strains with human-associated genotypes (7 out of 20 strains) occur at sites that are far from the predicted summer temperatures for *S. cerevisiae* (200-1300km away). Many of these strains with human-associated genotypes were isolated from locations that suggest a recent association with humans or that they could represent transient populations: a vineyard tree, buttermilk, a fish's gut, and soil at an agricultural college. It therefore appears that in Europe, *S. cerevisiae* strains that fell outside our predicted range were either rare strains with wild genotypes that were probably incorrectly mapped to higher elevations in mountain ranges, or more commonly human-associated *S. cerevisiae* that can occur at locations far from our predicted range

(Figure 5).

The patterns that we see in Europe are similar to those we see worldwide. *S. cerevisiae* strains have been isolated from soil, vine bark and buttercups in a New Zealand vineyard (Goddard *et al.*, 2010) outside the predicted range of summer temperatures (24°C, Figure 4B). These strains have genotypes similar to those of European rather than Asian *S. cerevisiae* (Cromie *et al.*, 2013) and thus may also represent vineyard-associated sink populations. Out of 122 *S. cerevisiae* strains with human-associated genotypes mapped worldwide, 38 strains occur at locations with summer temperatures that are lower than those we predict for *S. cerevisiae*, and 36 of these are more than 20km from locations with expected temperatures (Figure 5, Supplemental File 4). In contrast, the 41 out of 179 *S. cerevisiae* strains with wild genotypes outside the predicted range were much closer to locations within the predicted range than those with human-associated genotypes (Wilcoxon test,  $P = 9 \times 10^{-14}$ ). All 41 wild *S. cerevisiae* strains that were out of range were mapped only approximately, and 40 of these mapped to mountain locations in Europe and China that were within 8km of the predicted range (median distance = 1km; Figure 5 and Supplemental File 1). The only exception of a strain with a wild genotype occurring far out of range was isolated from a flower in Seattle ( $T_{max}$  23°C, 84km from the nearest site within range; Cromie *et al.*, 2013). We therefore conclude that the distribution of wild *S. cerevisiae* strains is consistent with our predicted range.

In addition, our model correctly predicts most of the differences and similarities in the ranges of *S. cerevisiae* and *S. paradoxus*. The difference in the optimum summer temperatures illustrated in Figure 4 can explain the presence of *S. paradoxus* and the absence of *S. cerevisiae* in the UK ( $T_{max}$  20°C, this study; 23°C Johnson *et al.*, 2004), Canada ( $T_{max}$  25°C, Charron *et al.*, 2014) and northern Germany ( $T_{max}$  21°C, Kowallik *et al.*, 2015). Conversely, the optimum summer temperatures for the two species overlap between 25 and 31°C, where we might therefore expect their sympatry: for example, in the northern USA,

471 parts of southern Europe, northern China, southeastern Brazil, South Africa, and south-  
472 ern Australia. In the northern USA ( $T_{max}$  30°C, Sniegowski *et al.*, 2002), and southern  
473 Europe at least ( $T_{max}$  31°C, Sampaio and Gonçalves, 2008; Table 2), these prediction are  
474 met.

# Discussion

By intensively sampling *S. paradoxus* from oak trees in northern and southern Europe (Figure 1, Supplemental File 3), we discovered associations between *S. paradoxus* isolation frequency, trunk girth (Figure 2) and summer temperature (Figure 3). Using the association of *S. paradoxus* with summer temperature in Europe, we predict regions where *S. paradoxus* and *S. cerevisiae* might occur worldwide (Figure 4). The worldwide distribution predicted by the optimum  $T_{max}$  for *S. paradoxus* is consistent with the observed distribution of *S. paradoxus* isolations from previous studies (Boynton and Greig, 2014; Figure 4A, Supplemental File 4), and with the detection of a northern limit to its distribution in Canada (Charron *et al.*, 2014; Leducq *et al.*, 2015). Similarly, our predicted optimum summer temperature for *S. cerevisiae* could potentially explain the success or failure to isolate *S. cerevisiae* in previous studies (Figure 4B and Supplemental File 4; Johnson *et al.*, 2004; Charron *et al.*, 2014; Kowallik *et al.*, 2015), and why *S. cerevisiae* strains isolated outside this range often have human-associated or mosaic genotypes indicative of transient populations (Figure 5 and Supplemental File 4).

Population genetic analyses show that the genetic diversity of *S. cerevisiae* is exceptionally high in the tropics and subtropics of China (Wang *et al.*, 2012; Almeida *et al.*, 2015), and is unusually low in Europe (Almeida *et al.*, 2015). The genetic diversity of a population is expected to increase as its habitat area increases (Rauch and Bar-Yam, 2005). High genetic diversity of *S. cerevisiae* in China is therefore compatible with the larger potential habitat area we predict in east Asia (Figure 4B), while low genetic diversity within Europe is consistent with the restricted range predicted for *S. cerevisiae* in Europe (Figure 5). An alternative explanation for the high genetic diversity of *S. cerevisiae* in China is an east Asian origin for the species (Wang *et al.*, 2012; Almeida *et al.*, 2015). It is currently unknown if other subtropical or tropical forest populations of *S. cerevisiae* have high genetic diversity since yeasts have been less intensively sampled from such regions (Robert *et al.*,

2006; Kurtzman *et al.*, 2015). Without further sampling in tropical and subtropical regions it is not possible to differentiate whether the higher diversity of *S. cerevisiae* in Asia reflects a greater habitat area or an Asian origin for *S. cerevisiae*.

Although our predictions fit well with the data currently available, this analysis represents only a starting point for understanding the ecological factors controlling the distribution of *S. paradoxus* and *S. cerevisiae*. In this study, we focused only on  $T_{max}$  as a climate variable because laboratory experiments suggest a difference between *S. paradoxus* and *S. cerevisiae* in their growth at high temperatures (Sweeney *et al.*, 2004; Liti *et al.*, 2009; Salvadó *et al.*, 2011; Leducq *et al.*, 2014), but not at low temperatures (Sweeney *et al.*, 2004; Will *et al.*, 2010; Salvadó *et al.*, 2011). Different climate variables are highly correlated within Europe, and using only the field sites in this study (Table 2), we cannot distinguish the association of *S. paradoxus* isolation frequency with summer temperature from associations with other factors such as rainfall or winter temperature. Furthermore, our observation of a negative association between  $T_{max}$  and *S. paradoxus* isolation frequency is based on analysis of data from only four independent field sites in southern Europe. Our conclusions would be strengthened by independent verification of the upper limit of the optimum  $T_{max}$  for *S. paradoxus* from additional sites. Thus, while we conclude that summer temperature can predict the range of *S. paradoxus* and *S. cerevisiae*, we do not claim that summer temperature is the causal factor limiting the distribution of *Saccharomyces* species.

In the case of *S. cerevisiae*, our predictions are based indirectly on ecological findings for *S. paradoxus* and laboratory growth experiments from North American strains (Sweeney *et al.*, 2004). In using this laboratory estimate, we assume that the physiological response to temperature is fixed within species. However, the *S. paradoxus* strains used by Sweeney *et al.* (2004) have a North American genotype (Kuehne *et al.*, 2007) that suggests they could have higher optimum growth temperature than *S. paradoxus* with European genotypes (Leducq *et al.*, 2014, 2015). We may therefore underestimate the difference between



527 *S. cerevisiae* and *S. paradoxus* (Leducq *et al.*, 2014). Another laboratory estimate however,  
528 suggests that we could be using an overestimate (Salvadó *et al.*, 2011; see Supplemental  
529 File 1 for discussion). Thus, the optimum summer temperature range that we predict for *S.*  
530 *cerevisiae* needs to be tested by directly sampling trees in subtropical and tropical regions  
531 with precise site locations and trunk girth measurements.

532 Another important predictor we uncover here for *S. paradoxus* isolation frequency is tree  
533 trunk girth (Figure 2), which is consistent with the intuitive notion that older trees harbour a  
534 greater diversity of microbial species including yeast. Indeed, the effect of trunk girth is so  
535 strong that if we had not included trunk girth in our model, we would not have detected an  
536 association of *S. paradoxus* isolation frequency with temperature. Intriguingly, the possible  
537 accumulation of yeasts on oak trees as they grow suggests a process of microbial succession  
538 that could parallel below ground processes (Bardgett *et al.*, 2005; Bardgett, 2005). Only  
539 42% of the deviance we observed in *S. paradoxus* isolation frequency could be explained  
540 by trunk girth and  $T_{max}$  together, suggesting that there are other important predictors of  
541 *S. paradoxus* isolation frequency that we do not study here. For example, *S. paradoxus*  
542 abundance could be influenced by interactions with other microbes (Kowalik *et al.*, 2015);  
543 the availability of nutrients (Sampaio and Gonçalves, 2008), water or oxygen (Deak, 2006);  
544 by acidity (Deak, 2006) or by sampling season (Glushakova *et al.*, 2007; Charron *et al.*,  
545 2014).

546 The general caveats that apply when considering climate envelope models (Araújo and Pe-  
547 terson, 2012; Jarnevich *et al.*, 2015) also apply to our findings. We outline regions that  
548 have summer temperatures predicted to be associated with high *S. paradoxus* or *S. cere-*  
549 *visiae* isolation frequency (Figure 4). We do not suggest that these regions show the actual  
550 distribution of the species however, because they might not contain viable habitat (Araújo  
551 and Peterson, 2012; Jarnevich *et al.*, 2015).

552 Our results also show that *S. paradoxus* and *S. cerevisiae* are not the only oak-associated

553 yeast species with geographic distributions in Europe that could be associated with temper-  
 554 ature (Table 1). *W. anomalus* is relevant to humans, as a wine yeast, food spoilage yeast and  
 555 biocontrol agent (Passoth *et al.*, 2006), occurring naturally on plants, and soil (Kurtzman,  
 556 2011). This species can be found on trees in northern North America (Charron *et al.*, 2014;  
 557 Sylvester *et al.*, 2015) and on central European mountains (Sláviková *et al.*, 2007). We  
 558 present evidence that *W. anomalus* is more common on northern than on southern Euro-  
 559 pean oaks (Table 1), suggesting a southern limit to its distribution in European woodlands.  
 560 Such a conclusion is consistent with the finding that *W. anomalus* is more often isolated by  
 561 incubating bark at low than at high temperatures (10°C vs. 30°C; Sylvester *et al.*, 2015). *L.*  
 562 *thermotolerans* also naturally occurs on oak bark (Sampaio and Gonçalves, 2008; Charron  
 563 *et al.*, 2014; Sylvester *et al.*, 2015; Freel *et al.*, 2015) and fruit (Lachance and Kurtzman,  
 564 2011), and has been proposed as a good model species for yeast population genetics (Freel  
 565 *et al.*, 2014, 2015). We find that it is more abundant on oaks in southern Europe (Table  
 566 1), consistent with the finding that it is isolated from bark at high temperatures (30°C vs.  
 567 10°C; Sylvester *et al.*, 2015).

568 Knowledge of the climate associations of animal and plant species can lead to the discov-  
 569 ery of new populations, as well as the prediction of glacial refugia, biodiversity hotspots,  
 570 extinction risks and responses to climate change (Araújo and Peterson, 2012; Jarnevich  
 571 *et al.*, 2015). Because they are too small to see, geographic distributions and therefore  
 572 ecological associations are more difficult to determine for free-living microbes. However  
 573 for microbial species that can be cultured, ecologically relevant factors such as temperature  
 574 preferences are easier to determine experimentally than they are for plants or animals. Our  
 575 work suggests that laboratory estimates of optimum growth temperature could be used to  
 576 predict global distributions of free-living microbes.

## 577 **Acknowledgements**

578 For field work and field assistance we thank Dan Smith, Cathy Walton, Steve Jones, Ana  
 579 Maria Pessoa, Carol Smith, Casey Bergman, Will Davenport, Belinda Kemp, Daniela Del-  
 580 neri, Lorenzo Brancia, James Patterson, Richard Harrison, Savvas Vatisdis. For contribu-  
 581 tions in the laboratory we thank Sandra Bunning, Sandra Taylor and Viranga Tilakaratna.  
 582 For helpful comments on the manuscript we thank Casey Bergman. This work was sup-  
 583 ported by the Natural Environment Research Council through a NERC Fellowship to DB  
 584 [grant number NE/D008824/1] (<http://www.nerc.ac.uk>).

# References

- Almeida, P., Barbosa, R., Zalar, P., Imanishi, Y., Shimizu, K., Turchetti, B., Legras, J.L., Serra, M., Dequin, S., Couloux, A., Guy, J., Bensasson, D., Gonçalves, P., and Sampaio, J.P. (2015). “A population genomics insight into the Mediterranean origins of wine yeast domestication.” *Molecular Ecology*, page Early View.
- Araújo, M.B. and Peterson, A.T. (2012). “Uses and misuses of bioclimatic envelope modeling.” *Ecology*, **93**(7): 1527–1539.
- Bardgett, R. (2005). *The Biology of Soil: A Community and Ecosystem Approach*. OUP Oxford. ISBN 978-0-19-852503-5.
- Bardgett, R.D., Bowman, W.D., Kaufmann, R., and Schmidt, S.K. (2005). “A temporal approach to linking aboveground and belowground ecology.” *Trends in Ecology & Evolution*, **20**(11): 634–641.
- Bensasson, D. (2011). “Evidence for a high mutation rate at rapidly evolving yeast centromeres.” *BMC Evol Biol*, **11**: 211.
- Bensasson, D., Zarowiecki, M., Burt, A., and Koufopanou, V. (2008). “Rapid evolution of yeast centromeres in the absence of drive.” *Genetics*, **178**(4): 2161–2167.
- Bonfield, J.K., Smith, K.F., and Staden, R. (1995). “A new DNA sequence assembly program.” *Nucleic acids research*, **23**(24): 4992–4999.
- Boynton, P.J. and Greig, D. (2014). “The ecology and evolution of non-domesticated *Saccharomyces* species.” *Yeast*, **31**(12): 449–462.
- Charron, G., Leducq, J.B., Bertin, C., Dubé, A.K., and Landry, C.R. (2014). “Exploring the northern limit of the distribution of *Saccharomyces cerevisiae* and *Saccharomyces paradoxus* in North America.” *FEMS yeast research*, **14**(2): 281–288.
- Crawley, M.J. (2005). *Statistics: An Introduction Using R*. Wiley-Blackwell, Chichester, West Sussex, England, 1 edition edition. ISBN 978-0-470-02298-6.
- Cromie, G.A., Hyma, K.E., Ludlow, C.L., Garmendia-Torres, C., Gilbert, T.L., May, P., Huang, A.A., Dudley, A.M., and Fay, J.C. (2013). “Genomic sequence diversity and population structure of *Saccharomyces cerevisiae* assessed by RAD-seq.” *G3 (Bethesda, Md.)*, **3**(12): 2163–2171.
- Deak, T. (2006). “Environmental factors influencing yeasts.” In “Biodiversity and Ecophysiology of Yeasts,” pages 155–174. Springer.
- Diezmann, S. and Dietrich, F.S. (2009). “*Saccharomyces cerevisiae*: Population Divergence and Resistance to Oxidative Stress in Clinical, Domesticated and Wild Isolates.” *PLoS ONE*, **4**(4): e5317.
- Fay, J.C. and Benavides, J.A. (2005). “Evidence for Domesticated and Wild Populations of *Saccharomyces cerevisiae*.” *PLoS Genetics*, **1**(1): e5.

- 617 Fitter, A. and More, D. (2002). *Trees*. HarperCollins, Glasgow. ISBN 0-00-711074-X 978-0-00-711074-2.
- 618 Freel, K.C., Charron, G., Leducq, J.B., Landry, C.R., and Schacherer, J. (2015). “*Lachancea quebecensis* sp.
- 619 nov., a yeast species consistently isolated from tree bark in the Canadian province of Québec.” *International Journal of Systematic and Evolutionary Microbiology*.
- 620
- 621 Freel, K.C., Friedrich, A., Hou, J., and Schacherer, J. (2014). “Population genomic analysis reveals highly
- 622 conserved mitochondrial genomes in the yeast species *Lachancea thermotolerans*.” *Genome Biology and*
- 623 *Evolution*, **6**(10): 2586–2594.
- 624 Glushakova, A.M., Ivannikova, Y.V., Naumova, E.S., Chernov, I.Y., and Naumov, G.I. (2007). “Massive
- 625 isolation and identification of *Saccharomyces paradoxus* yeasts from plant phyllosphere.” *Microbiology*,
- 626 **76**(2): 205–210.
- 627 Goddard, M.R., Anfang, N., Tang, R., Gardner, R.C., and Jun, C. (2010). “A distinct population of *Sac-*
- 628 *charomyces cerevisiae* in New Zealand: evidence for local dispersal by insects and human-aided global
- 629 dispersal in oak barrels.” *Environmental Microbiology*, **12**(1): 63–73.
- 630 Goddard, M.R. and Greig, D. (2015). “*Saccharomyces cerevisiae*: a nomadic yeast with no niche?” *FEMS*
- 631 *yeast research*, **15**(3).
- 632 Green, J. and Bohannan, B.J.M. (2006). “Spatial scaling of microbial biodiversity.” *Trends in Ecology &*
- 633 *Evolution*, **21**(9): 501–507.
- 634 Hijmans, R.J., Cameron, S.E., Parra, J.L., Jones, P.G., and Jarvis, A. (2005). “Very high resolution interpo-
- 635 lated climate surfaces for global land areas.” *International Journal of Climatology*, **25**(15): 1965–1978.
- 636 Hyma, K.E. and Fay, J.C. (2013). “Mixing of vineyard and oak-tree ecotypes of *Saccharomyces cerevisiae* in
- 637 North American vineyards.” *Molecular Ecology*, **22**(11): 2917–2930.
- 638 Jarnevich, C.S., Stohlgren, T.J., Kumar, S., Morissette, J.T., and Holcombe, T.R. (2015). “Caveats for correl-
- 639 ative species distribution modeling.” *Ecological Informatics*, **29**, Part 1: 6–15.
- 640 Johnson, L.J., Koufopanou, V., Goddard, M.R., Hetherington, R., Schafer, S.M., and Burt, A. (2004). “Pop-
- 641 ulation Genetics of the Wild Yeast *Saccharomyces paradoxus*.” *Genetics*, **166**(1): 43–52.
- 642 Kowallik, V., Miller, E., and Greig, D. (2015). “The interaction of *Saccharomyces paradoxus* with its natural
- 643 competitors on oak bark.” *Molecular Ecology*, **24**(7): 1596–1610.
- 644 Kuehne, H.A., Murphy, H.A., Francis, C.A., and Sniegowski, P.D. (2007). “Allopatric divergence, secondary
- 645 contact, and genetic isolation in wild yeast populations.” *Curr Biol*, **17**(5): 407–11.
- 646 Kurtzman, C.P. (2011). “Chapter 80 - *Wickerhamomyces* Kurtzman, Robnett & Basehoar-Powers (2008).”
- 647 In C.P.K.W.F. Boekhout, editor, “The Yeasts (Fifth Edition),” pages 899–917. Elsevier, London. ISBN
- 648 978-0-444-52149-1.
- 649 Kurtzman, C.P., Mateo, R.Q., Kolečka, A., Theelen, B., Robert, V., and Boekhout, T. (2015). “Advances

in yeast systematics and phylogeny and their use as predictors of biotechnologically important metabolic pathways.” *FEMS Yeast Research*, **15**(6): fov050.

Lachance, M.A., Boekhout, T., Scorzetti, G., Fell, J.W., and Kurtzman, C.P. (2011). “Chapter 90 - *Candida* Berkhout (1923).” In C.P.K.W.F. Boekhout, editor, “The Yeasts (Fifth Edition),” pages 987–1278. Elsevier, London. ISBN 978-0-444-52149-1.

Lachance, M.A. and Kurtzman, C.P. (2011). “Chapter 41 - *Lachancea* Kurtzman (2003).” In C.P.K.W.F. Boekhout, editor, “The Yeasts (Fifth Edition),” pages 511–519. Elsevier, London. ISBN 978-0-444-52149-1.

Leducq, J.B., Charron, G., Samani, P., Dubé, A.K., Sylvester, K., James, B., Almeida, P., Sampaio, J.P., Hittinger, C.T., Bell, G., and Landry, C.R. (2014). “Local climatic adaptation in a widespread microorganism.” *Proceedings of the Royal Society B: Biological Sciences*, **281**(1777): 20132472.

Leducq, J.B., Nielly-Thibault, L., Charron, G., Eberlein, C., Verta, J.P., Samani, P., Sylvester, K., Hittinger, C.T., Bell, G., and Landry, C.R. (2015). “Speciation driven by hybridization and chromosomal plasticity in a wild yeast.” *bioRxiv*, page 027383.

Liti, G. (2015). “The fascinating and secret wild life of the budding yeast *S. cerevisiae*.” *eLife*, **4**: e05835.

Liti, G., Carter, D.M., Moses, A.M., Warringer, J., Parts, L., James, S.A., Davey, R.P., Roberts, I.N., Burt, A., Koufopanou, V., Tsai, I.J., Bergman, C.M., Bensasson, D., O’Kelly, M.J.T., van Oudenaarden, A., Barton, D.B.H., Bailes, E., Nguyen, A.N., Jones, M., Quail, M.A., *et al.* (2009). “Population genomics of domestic and wild yeasts.” *Nature*, **458**(7236): 337–341.

Maganti, H., Bartfai, D., and Xu, J. (2011). “Ecological structuring of yeasts associated with trees around Hamilton, Ontario, Canada.” *FEMS yeast research*, **12**: 9–19.

Martiny, J.B.H., Bohannan, B.J.M., Brown, J.H., Colwell, R.K., Fuhrman, J.A., Green, J.L., Horner-Devine, M.C., Kane, M., Krumins, J.A., Kuske, C.R., Morin, P.J., Naeem, S., Øvreås, L., Reysenbach, A.L., Smith, V.H., and Staley, J.T. (2006). “Microbial biogeography: putting microorganisms on the map.” *Nature Reviews Microbiology*, **4**(2): 102–112.

Naumov, G., Naumova, E., and Sniegowski, P. (1997). “Differentiation of European and Far East Asian populations of *Saccharomyces paradoxus* by allozyme analysis.” *Int J Syst Bacteriol*, **47**(2): 341–344.

Passoth, V., Fredlund, E., Druvefors, U.Ä., and Schnürer, J. (2006). “Biotechnology, physiology and genetics of the yeast *Pichia anomala*.” *FEMS Yeast Research*, **6**(1): 3–13.

Rauch, E.M. and Bar-Yam, Y. (2005). “Estimating the total genetic diversity of a spatial field population from a sample and implications of its dependence on habitat area.” *Proceedings of the National Academy of Sciences of the United States of America*, **102**(28): 9826–9829.

Robert, V., Stalpers, J., Boekhout, T., and Tan, S.h. (2006). “Yeast biodiversity and culture collections.” In

683 “Biodiversity and ecophysiology of yeasts,” pages 31–44. Springer.

684 Salvadó, Z., Arroyo-López, F.N., Guillamón, J.M., Salazar, G., Querol, A., and Barrio, E. (2011). “Tem-  
685 perature Adaptation Markedly Determines Evolution within the Genus *Saccharomyces*.” *Applied and*  
686 *Environmental Microbiology*, **77**(7): 2292–2302.

687 Sampaio, J.P. and Gonçalves, P. (2008). “Natural Populations of *Saccharomyces kudriavzevii* in Portugal  
688 Are Associated with Oak Bark and Are Sympatric with *S. cerevisiae* and *S. paradoxus*.” *Applied and*  
689 *Environmental Microbiology*, **74**(7): 2144–2152.

690 Sláviková, E., Vadkertiová, R., and Vránová, D. (2007). “Yeasts colonizing the leaf surfaces.” *Journal of*  
691 *Basic Microbiology*, **47**(4): 344–350.

692 Sniegowski, P.D., Dombrowski, P.G., and Fingerman, E. (2002). “*Saccharomyces cerevisiae* and *Saccha-*  
693 *romyces paradoxus* coexist in a natural woodland site in North America and display different levels of  
694 reproductive isolation from European conspecifics.” *FEMS Yeast Research*, **1**(4): 299–306.

695 Sutton, D.A. (1990). *Trees of Britain and Europe*. Kingfisher, London. ISBN 0-86272-523-2 978-0-86272-  
696 523-5.

697 Sweeney, J.Y., Kuehne, H.A., and Sniegowski, P.D. (2004). “Sympatric natural *Saccharomyces cerevisiae* and  
698 *S. paradoxus* populations have different thermal growth profiles.” *FEMS Yeast Research*, **4**(4-5): 521–525.

699 Sylvester, K., Wang, Q.M., James, B., Mendez, R., Hulfachor, A.B., and Hittinger, C.T. (2015). “Temper-  
700 ature and host preferences drive the diversification of *Saccharomyces* and other yeasts: a survey and the  
701 discovery of eight new yeast species.” *FEMS yeast research*, **15**(3): fov002.

702 Tanghe, A., Carbrey, J.M., Agre, P., Thevelein, J.M., and Van Dijck, P. (2005). “Aquaporin expression and  
703 freeze tolerance in *Candida albicans*.” *Applied and Environmental Microbiology*, **71**(10): 6434–6437.

704 Taylor, J.W., Turner, E., Townsend, J.P., Dettman, J.R., and Jacobson, D. (2006). “Eukaryotic microbes,  
705 species recognition and the geographic limits of species: examples from the kingdom Fungi.” *Philosoph-*  
706 *ical Transactions of the Royal Society B: Biological Sciences*, **361**(1475): 1947–1963.

707 Wang, Q.M., Liu, W.Q., Liti, G., Wang, S.A., and Bai, F.Y. (2012). “Surprisingly diverged populations  
708 of *Saccharomyces cerevisiae* in natural environments remote from human activity.” *Molecular Ecology*,  
709 **21**(22): 5404–5417.

710 Will, J.L., Kim, H.S., Clarke, J., Painter, J.C., Fay, J.C., and Gasch, A.P. (2010). “Incipient Balancing  
711 Selection through Adaptive Loss of Aquaporins in Natural *Saccharomyces cerevisiae* Populations.” *PLoS*  
712 *Genet*, **6**(4): e1000893.

713 Zhang, H., Skelton, A., Gardner, R.C., and Goddard, M.R. (2010). “*Saccharomyces paradoxus* and *Sac-*  
714 *charomyces cerevisiae* reside on oak trees in New Zealand: evidence for migration from Europe and  
715 interspecies hybrids.” *FEMS Yeast Research*, **10**(7): 941–947.



# Tables and Figures

Table 1: Yeast species isolated from oaks and fruits in northern and southern Europe

| Region <sup>a</sup> | Host  | Samples          | Sites | Strains | Species                                      |
|---------------------|-------|------------------|-------|---------|----------------------------------------------|
| North               | Oak   | 372 <sup>b</sup> | 9     | 39      | <i>Saccharomyces paradoxus</i>               |
|                     |       |                  |       | 16      | <i>Lachancea thermotolerans</i>              |
|                     |       |                  |       | 11      | <i>Wickerhamomyces anomalus</i>              |
|                     |       |                  |       | 3       | <i>Candida albicans</i>                      |
|                     |       |                  |       | 2       | <i>Hanseniaspora osmophila</i>               |
|                     |       |                  |       | 2       | <i>Hyphopichia burtonii</i>                  |
|                     |       |                  |       | 2       | <i>Saccharomycetaceae sp.</i>                |
|                     |       |                  |       | 2       | <i>Saccharomycodes ludwigii</i>              |
|                     |       |                  |       | 1       | 7 different <i>Saccharomycetales</i> species |
|                     |       |                  |       |         |                                              |
| South               | Oak   | 261              | 4     | 46      | <i>Lachancea thermotolerans</i>              |
|                     |       |                  |       | 44      | <i>Saccharomyces paradoxus</i>               |
|                     |       |                  |       | 4       | <i>Pichia manshurica</i>                     |
|                     |       |                  |       | 3       | <i>Saccharomyces cerevisiae</i>              |
|                     |       |                  |       | 2       | <i>Kluyveromyces lactis</i>                  |
|                     |       |                  |       | 2       | <i>Meyerozyma sp.</i>                        |
| North               | Grape | 57 <sup>c</sup>  | 2     | 1       | 3 different <i>Saccharomycetales</i> species |
|                     |       |                  |       | 19      | <i>Saccharomyces cerevisiae</i>              |
|                     |       |                  |       | 8       | <i>Wickerhamomyces anomalus</i>              |
|                     |       |                  |       | 2       | <i>Dekkera bruxellensis</i>                  |
|                     |       |                  |       | 2       | <i>Saccharomyces paradoxus</i>               |
| South               | Grape | 29               | 2     | 1       | 4 different <i>Saccharomycetales</i> species |
|                     |       |                  |       | 4       | <i>Starmerella bacillaris</i>                |
| South               | Fig   | 93 <sup>d</sup>  | 4     | 1       | 4 different <i>Saccharomycetales</i> species |
|                     |       |                  |       | 8       | <i>Meyerozyma sp.</i>                        |
|                     |       |                  |       | 6       | <i>Saccharomyces cerevisiae</i>              |
|                     |       |                  |       | 5       | <i>Zygosaccharomyces bailii</i>              |
|                     |       |                  |       | 4       | <i>Saccharomyces sp.</i>                     |
|                     |       |                  |       | 3       | <i>Pichia kudriavzevii</i>                   |
|                     |       |                  |       | 3       | <i>Starmerella bacillaris</i>                |
|                     |       |                  |       | 1       | 4 different <i>Saccharomycetales</i> species |

<sup>a</sup> Nine UK sites are classed as northern and seven sites in France, Greece and Portugal are classed as southern (Figure 1). Supplemental File 2 contains detailed information for all yeast isolates.

<sup>b</sup> Includes data for 15 soil samples collected at the base of oak trees.

<sup>c</sup> Includes data for 21 samples from grape vine bark and 12 samples from fermenting grape must.

<sup>d</sup> Includes data for 9 samples from fig tree bark.



Table 2: Isolation frequencies of *S. cerevisiae* and *S. paradoxus* from oak bark

| Country | Site | Location             | Trees <sup>a</sup> | Samples | Mean<br>$T_{max}$ <sup>b</sup> | Mean<br>girth <sup>c</sup> | <i>Sc</i> | <i>Sp</i> | <i>Sp</i><br>freq. <sup>d</sup> |
|---------|------|----------------------|--------------------|---------|--------------------------------|----------------------------|-----------|-----------|---------------------------------|
| U.K.    | 1    | Brockholes Wood      | 15                 | 131     | 19.6                           | 1.5                        | 0         | 10        | 0.08                            |
|         | 2    | Chorlton             | 1                  | 1       | 21.3                           | 1.1                        | 0         | 0         | 0.00                            |
|         | 3    | Ladybower Wood       | 4                  | 32      | 19.6                           | 2.3                        | 0         | 7         | 0.22                            |
|         | 4    | Tatton Park          | 2                  | 5       | 20.1                           | 4.0                        | 0         | 1         | 0.20                            |
|         | 5    | Earlham Park         | 2                  | 3       | 20.9                           | 6.8                        | 0         | 1         | 0.33                            |
|         | 6    | Fritham, New Forest  | 15                 | 60      | 21.3                           | 3.3                        | 0         | 7         | 0.12                            |
|         | 7    | Ocknell, New Forest  | 15                 | 59      | 21.4                           | 1.5                        | 0         | 4         | 0.07                            |
|         | 8    | Davenport Vineyard   | 6                  | 28      | 21.4                           | 1.3                        | 1         | 1         | 0.04                            |
|         | 9    | Plumpton Vineyard    | 6                  | 24      | 21.6                           | 1.3                        | 0         | 3         | 0.12                            |
| France  | 10   | Montbarri, Bédarieux | 15                 | 59      | 28.0                           | 0.8                        | 1         | 9         | 0.15                            |
| Greece  | 11   | Taxiarchis           | 15                 | 60      | 27.3                           | 0.8                        | 0         | 20        | 0.33                            |
|         | 12   | Pyrgadikia           | 15                 | 82      | 30.9                           | 1.4                        | 2         | 14        | 0.17                            |
|         | 13   | Parnitha             | 15                 | 60      | 29.7                           | 1.1                        | 0         | 1         | 0.02                            |

<sup>a</sup> Includes data for 22 trees that were excluded from generalised linear models because of missing data for tree trunk girth (see Methods).

<sup>b</sup> Average of the daily maximum temperature in the hottest month of the year (°C). Weighted means are shown in cases where  $T_{max}$  of trees differ within a site.

<sup>c</sup> Weighted mean trunk girth (m), weighted by the number of bark samples per tree.

<sup>d</sup> For each site, the number of *S. paradoxus* isolates / number of samples.

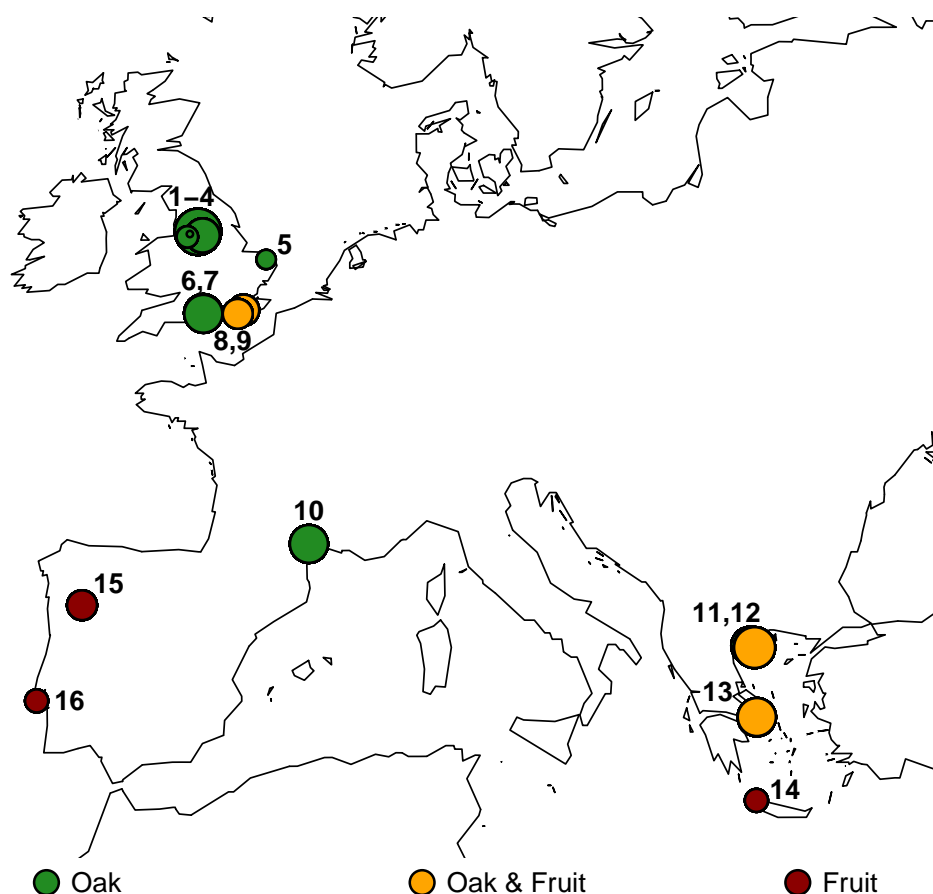

Figure 1: **Sample collection sites for yeast strains isolated in this study.** Circles are scaled by the natural log of the sample size. Numbers correspond to sites with oak trees in Table 2. No oak trees were sampled at field sites 14-16, and thus these sites were not included in Table 2.

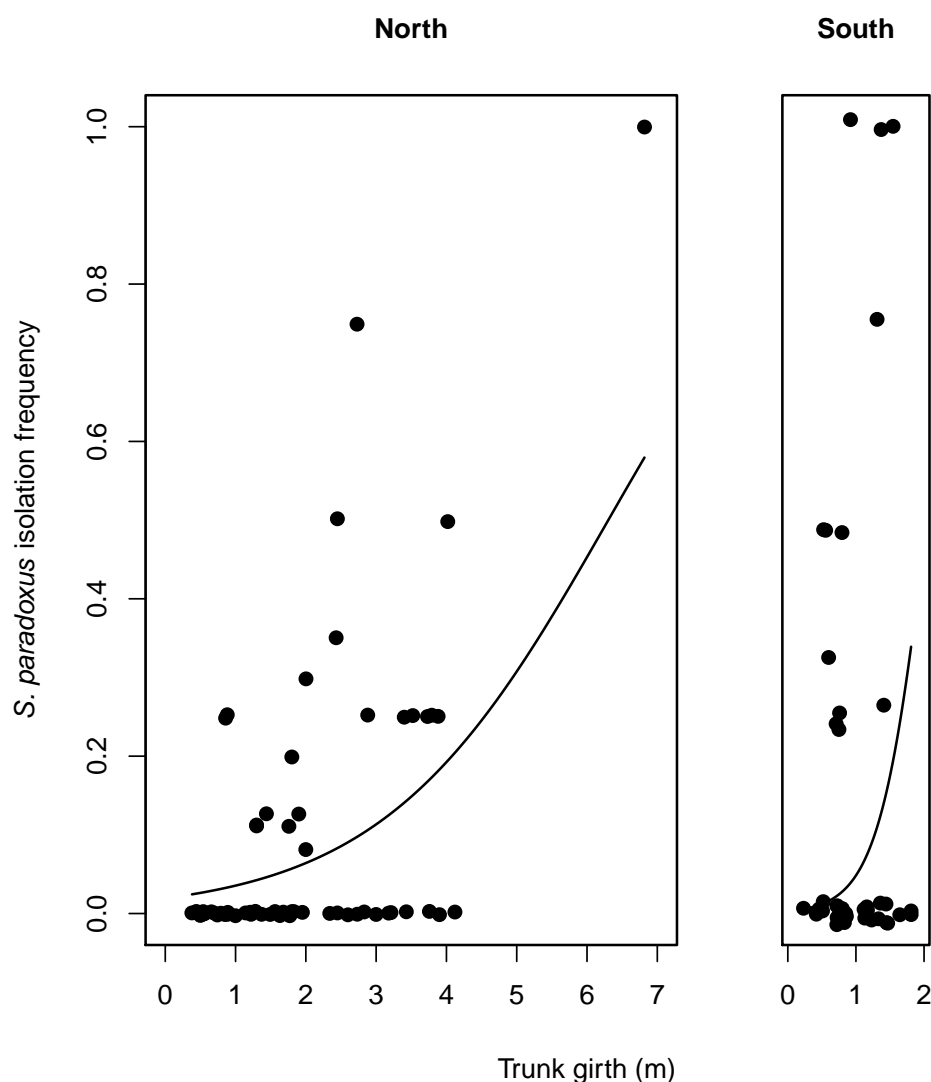

Figure 2: *S. paradoxus* isolation frequency increases with trunk girth. Points show the observed isolation frequencies for 104 trees from northern (UK) and southern Europe (France and Greece). For each tree, we estimated the frequency of *S. paradoxus* isolation as the number of pieces of bark yielding *S. paradoxus* divided by the number of pieces of bark sampled. Points are clustered around discrete frequencies because in most cases the number of pieces of bark sampled was four. We therefore used jitter to allow better visualisation of data. Lines show the probability of isolating *S. paradoxus* estimated from the final GLM assuming median summer temperatures in northern ( $T_{max}=21.3^{\circ}\text{C}$ ) and southern Europe ( $T_{max}=28.6^{\circ}\text{C}$ )

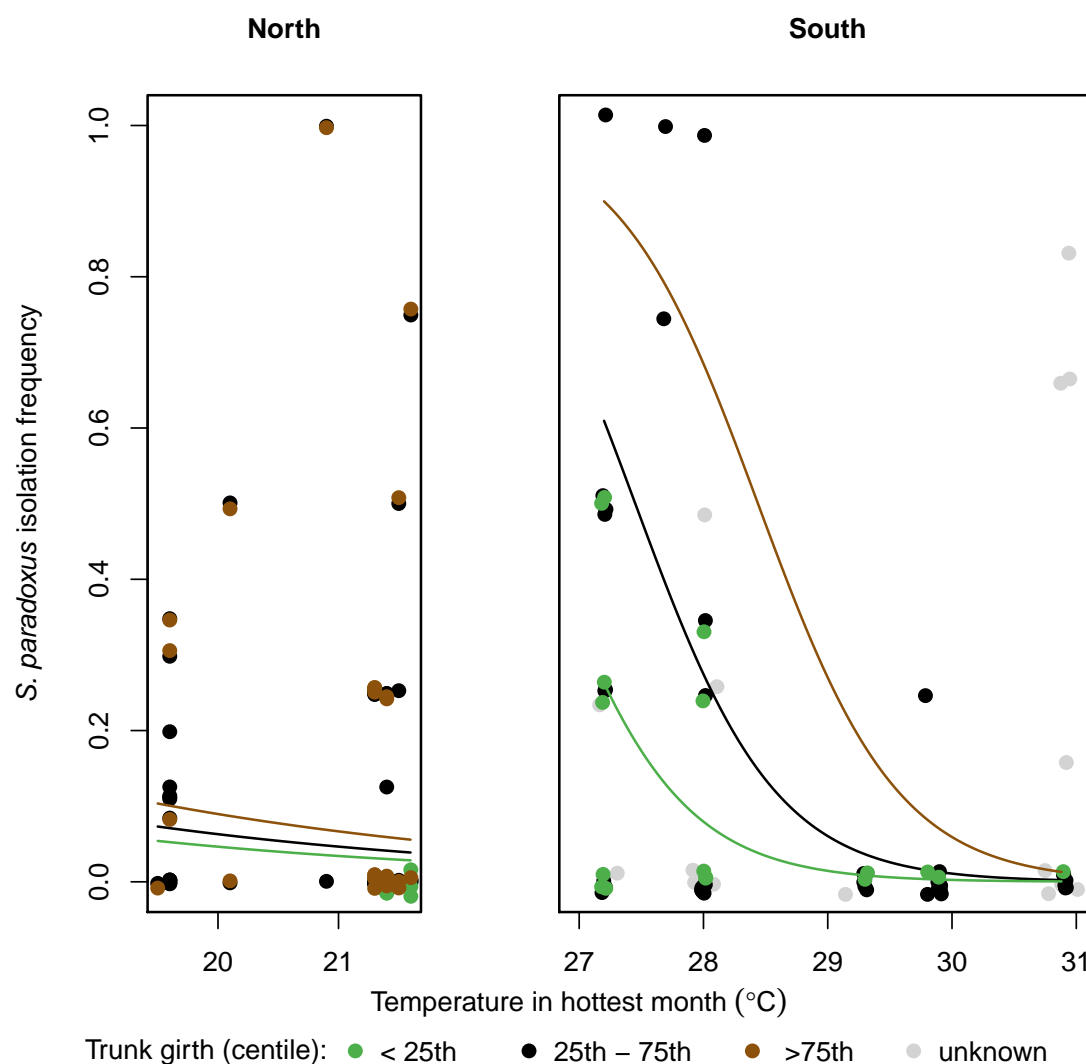

Figure 3: **The effects of temperature in the hottest month *S. paradoxus* isolation frequency.** *S. paradoxus* isolation frequency is estimated as the proportion of bark samples from each tree with *S. paradoxus*; more specifically, the number of *S. paradoxus* isolates for a tree divided by the total number of bark samples obtained for that tree. Points show the distribution of the data, including points for which no trunk girth data are available (grey, see Methods). Jitter was used to better display overlapping points. Lines show the predicted probability of isolating *S. paradoxus* and are estimated from the final generalised linear model given lower (0.8m), median (1.3m), and upper (1.9m) quartile measurements of tree trunk girth (green, black and brown respectively).

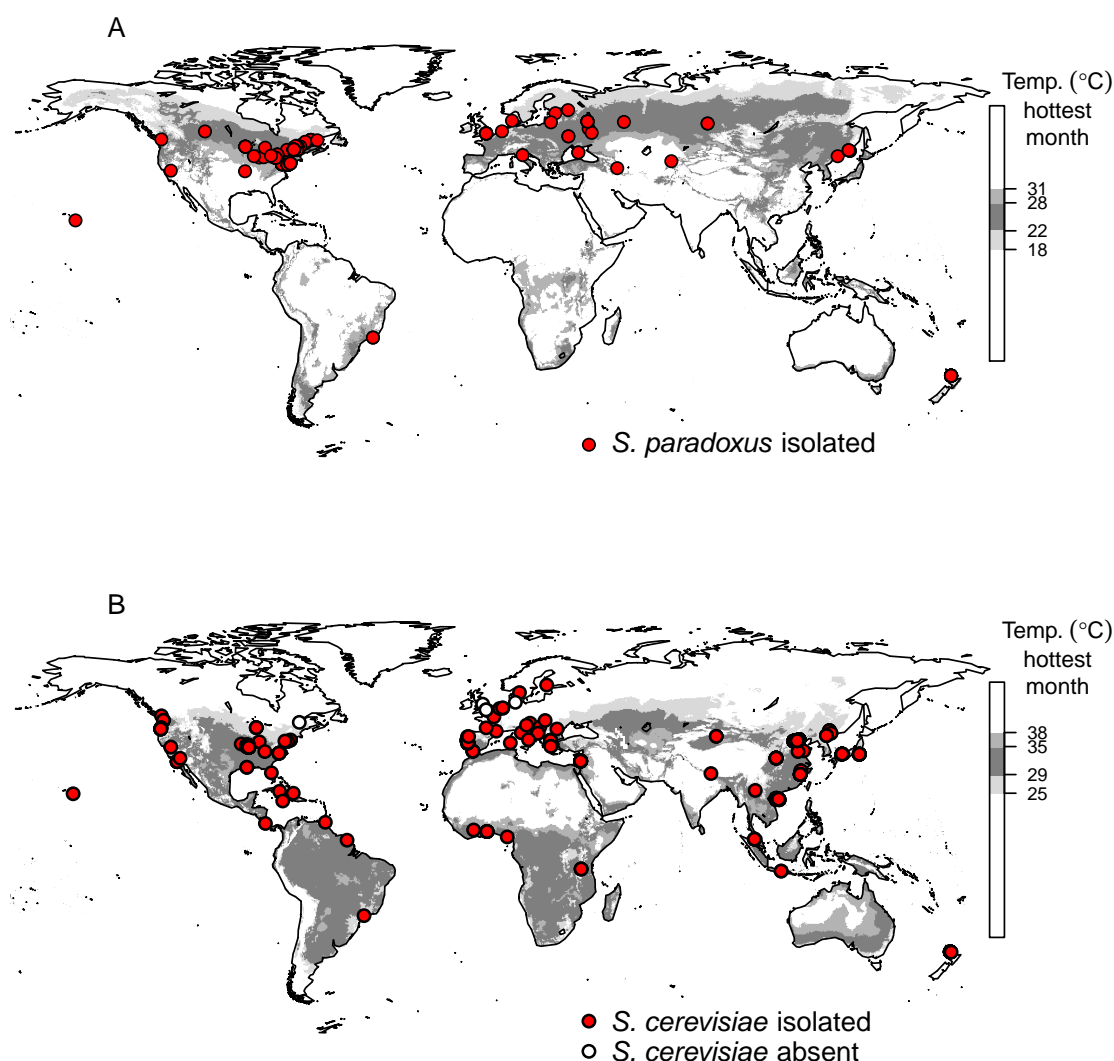

Figure 4: **Global distribution of the predicted optimum temperature range for (A) *S. paradoxus* and (B) *S. cerevisiae*.** Optimum temperatures for *S. paradoxus* are estimated from Figure 3, and for *S. cerevisiae* we assume the optimum is approximately 7°C higher than that of *S. paradoxus* (Sweeney *et al.*, 2004). Red circles show the approximate origin of strains published in large genotyping studies (Liti *et al.* (2009); Zhang *et al.* (2010); Kuehne *et al.* (2007); Leducq *et al.* (2014); Naumov *et al.* (1997); Cromie *et al.* (2013); Wang *et al.* (2012); Almeida *et al.* (2015) and references therein). Location and genotype (Almeida *et al.*, 2015) information from this study is included for *S. cerevisiae* strains but not for *S. paradoxus*, because data for *S. paradoxus* were used to generate our predictions. White circles show locations where surveys of over 100 bark samples yielded no *S. cerevisiae* and are summarised from this study, Charron *et al.* (2014), Johnson *et al.* (2004) and Kowallik *et al.* (2015).

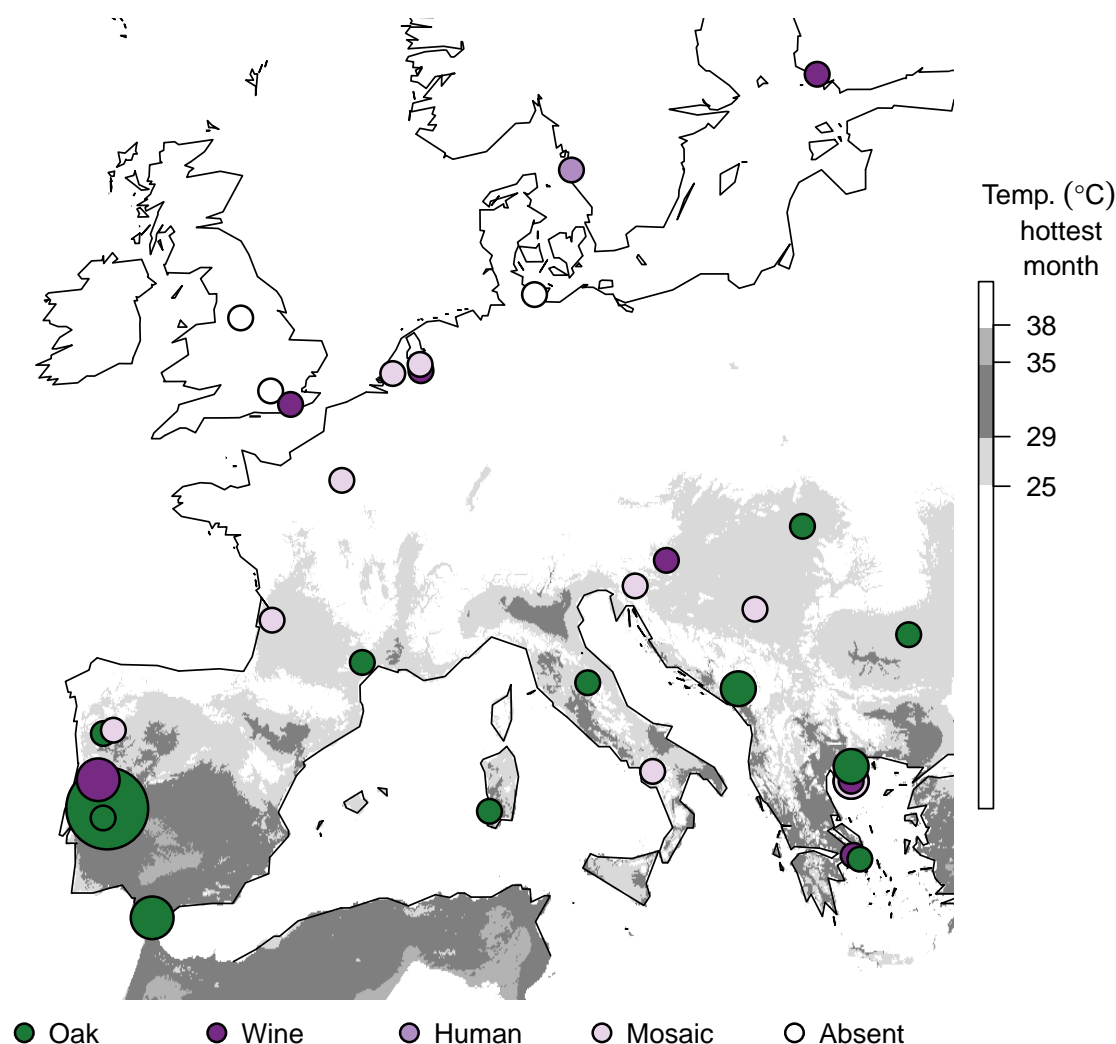

**Figure 5: Only feral *S. cerevisiae* or those with mosaic genotypes occur outside the predicted optimal temperature range.** The regions with average temperature in the hottest month where we expect *S. cerevisiae* are shaded in grey, assuming it correlates with a 7°C higher average temperature in the hottest month than *S. paradoxus* (Sweeney *et al.*, 2004). White points show the locations where over a hundred pieces of bark yielded no *S. cerevisiae* (this study, Johnson *et al.*, 2004; Kowallik *et al.*, 2015). The remaining points show the geographic sources of 46 *S. cerevisiae* strains isolated from various sources that include trees, soil, fruits and beer (but not including wine or grapes), and are coloured by genotype (see Results; data from Cromie *et al.*, 2013; Almeida *et al.*, 2015). Points are scaled by the square root of sample size and two points in Greece were repositioned slightly to so that all overlapping points are visible.

# Authors' Contributions

D.B. and A.P. conceived and designed the research; A.P. and D.B. performed field sampling; A.P. and H.A.R. performed yeast isolation and species identification; D.B. and H.A.R. analysed the data; D.B. and H.A.R. wrote the manuscript.

# Data Accessibility

DNA sequences determined for this study are available in GenBank: KT206983-KT207282. Photographs of host plants and DNA sequences that did not fulfil the submission criteria at GenBank are available at <https://github.com/bensassonlab/yeastecology/>.

# Supplemental Files

1. A .pdf with (i) a Supplemental Results section showing the evidence for the isolation of *C. albicans*; (ii) Supplemental Results showing similar *S. cerevisiae* isolation rates from grape, grapevine bark, and oak bark in vineyards, and similar rates from figs and fig tree bark in southern Europe; (iii) Supplemental Results showing that differences among oak trees can explain 52% of the deviance among bark samples, and that bark weight and collection month are not good predictors of the presence of *S. paradoxus*; (iv) Supplemental Results showing the effect of using a different laboratory estimate of the difference in optimal growth temperature for *S. paradoxus* and *S. cerevisiae*; (v) A table of primers used for PCR amplification and DNA sequencing; (vi) Supplemental Figure 1 showing that the approximate geographic positions of *S. cerevisiae* strains from China are close to locations with expected summer temperatures.
2. A .tsv file that summarises the BLAST results for the 371 DNA sequences generated for this study, the species call of the associated yeast strains, and NCBI accession numbers. The query name is the name of the DNA sequence query as it appears in blast outputs; DBuid is the unique identification number in the Bensasson lab yeast collection; "classification" describes how we classified this sequence for the purpose of our statistical analysis; Ascore is the highest BLAST score when queried against

Ascomycota at NCBI; Evalue is the E value associated with this; Cscore and Pscore are the highest BLAST scores when queried against *S. cerevisiae* and *S. paradoxus* respectively. Some DNA sequences were not submitted to NCBI. These were 71 DNA sequences that were technical replicates, contained more than 100 low quality bases (bases with phred-scaled score below 40) or that had fewer than 200 high quality bases and are available at <https://github.com/bensassonlab/yeastecology/>. Samples with the suffix ".SM" and ".YM" for strainUID may contain multiple yeast strains, because they were grown from several colonies each from a Sniegowski selection plate or a YPD plate respectively. All other strains were grown from a single colony.

3. A .tsv file that summarises the presence or absence of *S. cerevisiae* (Scer), *S. paradoxus* (Spar), other yeast that is amplified by primers in the ITS region (otherAmplifiedITS), or other microbial growth (otherGrowth) for every sample collected for this study. This table also includes a description of each sample substrate (e.g. fig, bark, must), field collection date (fieldDate), sample weight (in grams), isolation temperature (°C), the name of the collection site, the species name of the host plant, latitude and longitude (WGS84 format), elevation (in metres), trunk girth (in metres) and pH of soil at base of host where available. Many oak trees classified as most similar to *Q. robur* or *Q. petraea* appeared intermediate between the two species.
4. A .tsv file with details of 301 *S. cerevisiae* and 246 *S. paradoxus* isolates and the geographic locations from which they were sampled. Genotype information is included where it is available. In cases where latitude and longitude were estimated from Google Maps, we include the Google search term used. Where site descriptions cover a large region (e.g. a country name) we selected a point in the centre of that possible region. Yeast isolates with site descriptions that did not allow location within 100-200 km were omitted from this summary. In the case of the *S. paradoxus* strains described in Zhang *et al.* (2010), strain names were not reported, so they are all listed as "SpNZ". In Cromie *et al.* (2013), no strains were classified as admixed (or "mosaics") even though many of the same strains were classified this way in other studies (Liti *et al.*, 2009), we therefore used the data in Cromie *et al.*, 2013 to classify mosaics (those assigned to a single population by InStruct with a probability lower than 0.9375; 15 out of 16 chromosomes). The estimated  $T_{max}$  (in °C×10) for the field site of each strain is shown along with the longitude (TmaxLon) and latitude (TmaxLat) coordinates of the a closest pixel to our estimate of site location at 30 arc-second (approximately 1km) resolution from the WorldClim dataset version



1.4 (1950-2000, release 3, <http://www.worldclim.org>). However, the positioning of almost all sites is approximate (up to the nearest 100-200km, see Methods).
